# Supplementary material for: A novel bio-based AB2monomer for preparing hyperbranched polyamides derived from levulinic acid and furfurylamine
Source: Royal Society of Chemistry journal article supplement (doi:10.1039/c9py01253b), 2019-01-01
Supplement: c9py01253b1.pdf [file c9py01253b1.pdf]

## Novel Bio-based AB<sub>2</sub> Monomer for preparing Hyperbranched Polyamides Derived from Levulinic Acid and Furfurylamine

Meng-Ling Yang<sup>a</sup>, Yue-Xiao Wu<sup>a</sup>, Yun Liu<sup>b</sup>, Jin-Jun Qiu<sup>a</sup>, Cheng-Mei Liu<sup>\*a</sup>

### Acquisition Parameter

|             |          |                      |          |                  |           |
|-------------|----------|----------------------|----------|------------------|-----------|
| Source Type | ESI      | Ion Polarity         | Negative | Set Nebulizer    | 0.3 Bar   |
| Focus       | Active   |                      |          | Set Dry Heater   | 200 °C    |
| Scan Begin  | 50 m/z   | Set Capillary        | 3500 V   | Set Dry Gas      | 4.0 l/min |
| Scan End    | 1200 m/z | Set End Plate Offset | -500 V   | Set Divert Valve | Waste     |

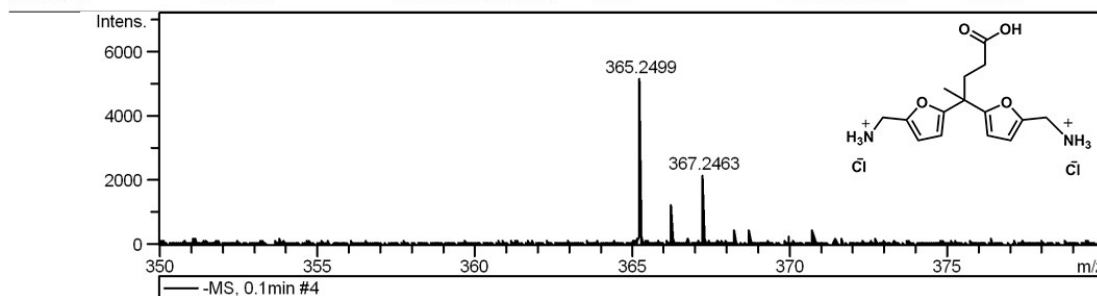

S1: Mass Spectrum of FDAH-A

### Acquisition Parameter

|             |          |                      |          |                  |           |
|-------------|----------|----------------------|----------|------------------|-----------|
| Source Type | ESI      | Ion Polarity         | Positive | Set Nebulizer    | 0.3 Bar   |
| Focus       | Active   |                      |          | Set Dry Heater   | 180 °C    |
| Scan Begin  | 50 m/z   | Set Capillary        | 4500 V   | Set Dry Gas      | 4.0 l/min |
| Scan End    | 3000 m/z | Set End Plate Offset | -500 V   | Set Divert Valve | Waste     |

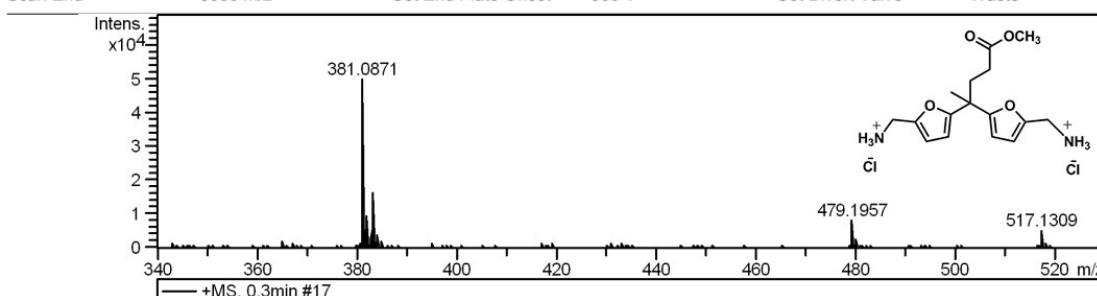

S2: Mass Spectrum of FDAH-E

### Acquisition Parameter

|             |          |                      |          |                  |           |
|-------------|----------|----------------------|----------|------------------|-----------|
| Source Type | ESI      | Ion Polarity         | Positive | Set Nebulizer    | 0.3 Bar   |
| Focus       | Active   |                      |          | Set Dry Heater   | 200 °C    |
| Scan Begin  | 50 m/z   | Set Capillary        | 4000 V   | Set Dry Gas      | 4.0 l/min |
| Scan End    | 1200 m/z | Set End Plate Offset | -500 V   | Set Divert Valve | Waste     |

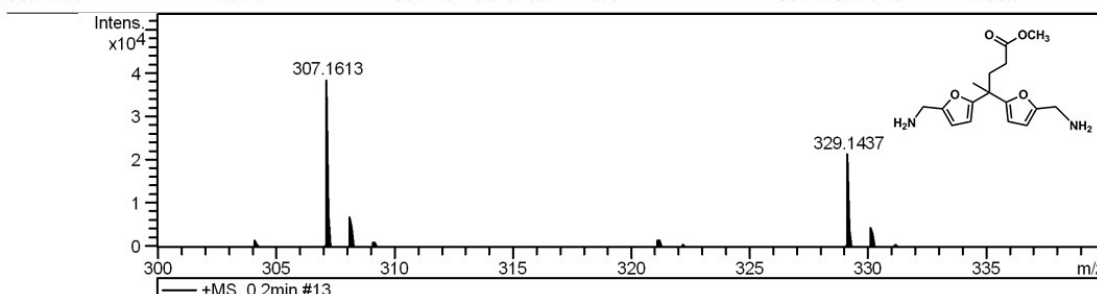

S3: Mass Spectrum of FDA-E

**Acquisition Parameter**

|             |          |                      |          |                  |           |
|-------------|----------|----------------------|----------|------------------|-----------|
| Source Type | ESI      | Ion Polarity         | Positive | Set Nebulizer    | 0.3 Bar   |
| Focus       | Active   |                      |          | Set Dry Heater   | 200 °C    |
| Scan Begin  | 50 m/z   | Set Capillary        | 4000 V   | Set Dry Gas      | 4.0 l/min |
| Scan End    | 1200 m/z | Set End Plate Offset | -500 V   | Set Divert Valve | Waste     |

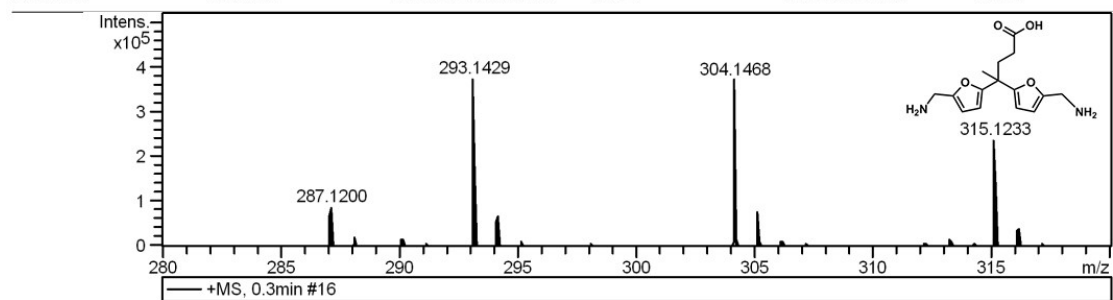

S4: Mass Spectrum of FDA-A

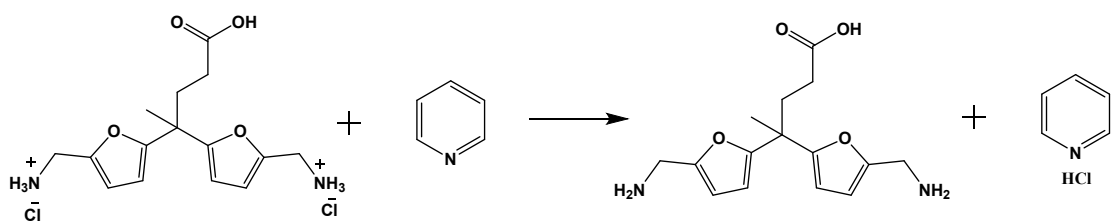

S5: Synthetic Route of FDA-A

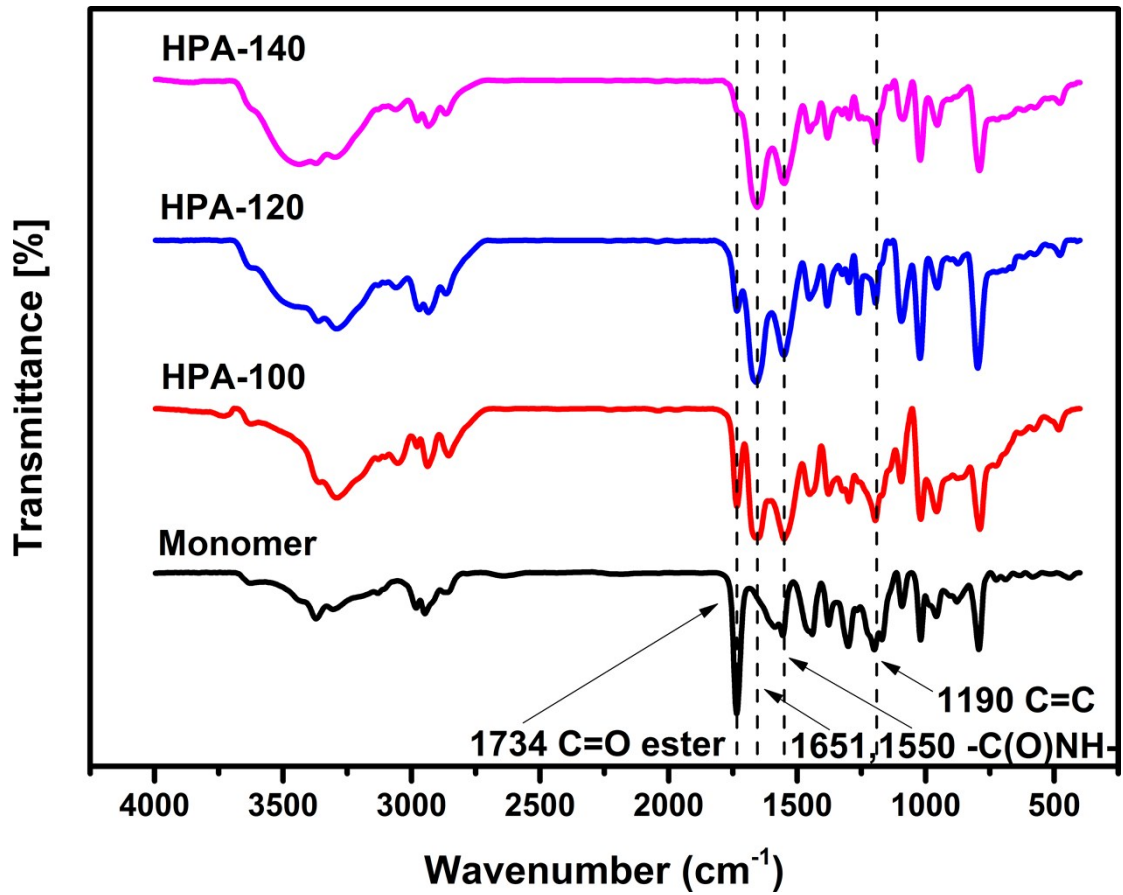

S6: FTIR spectra of HPA-100, HPA-120, and HPA-140

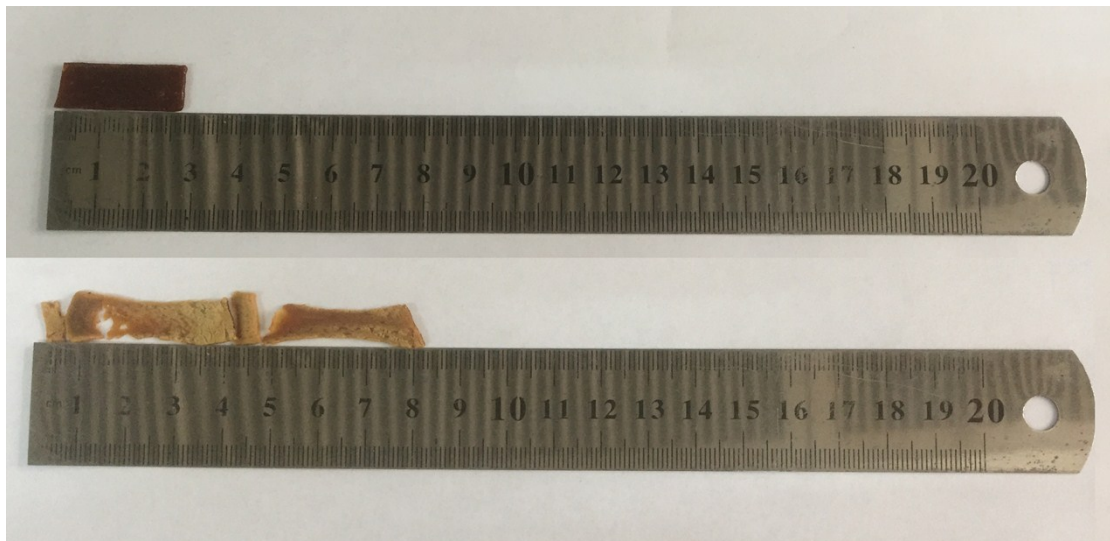

S7: Comparison of the freeze-dried HPA-120 soaked in distilled water before (above) and after (under)

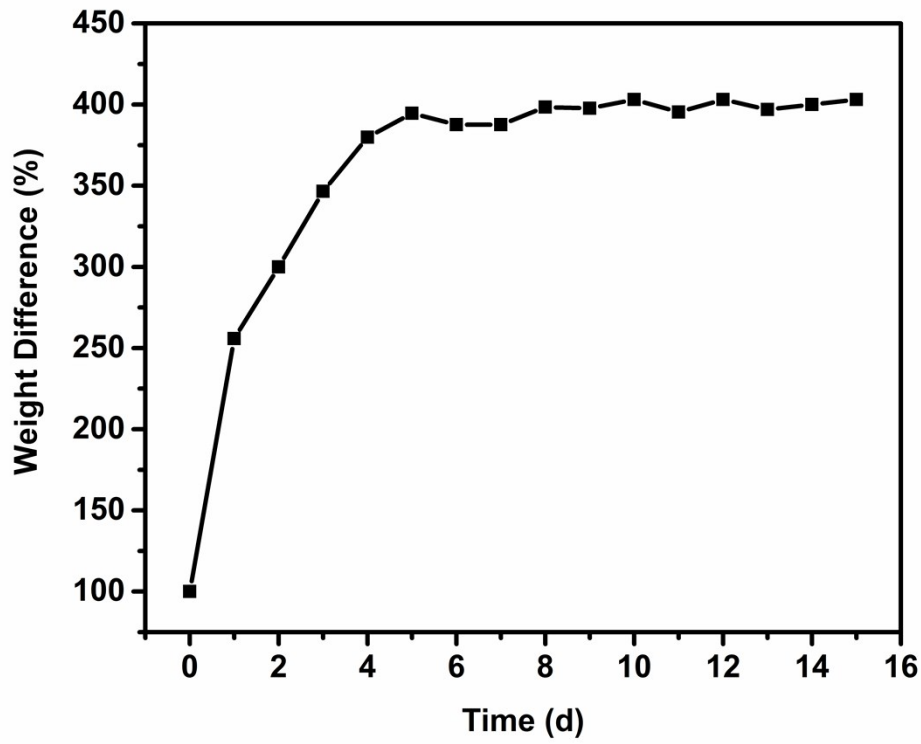

S8: Water adsorption test of HPA-120

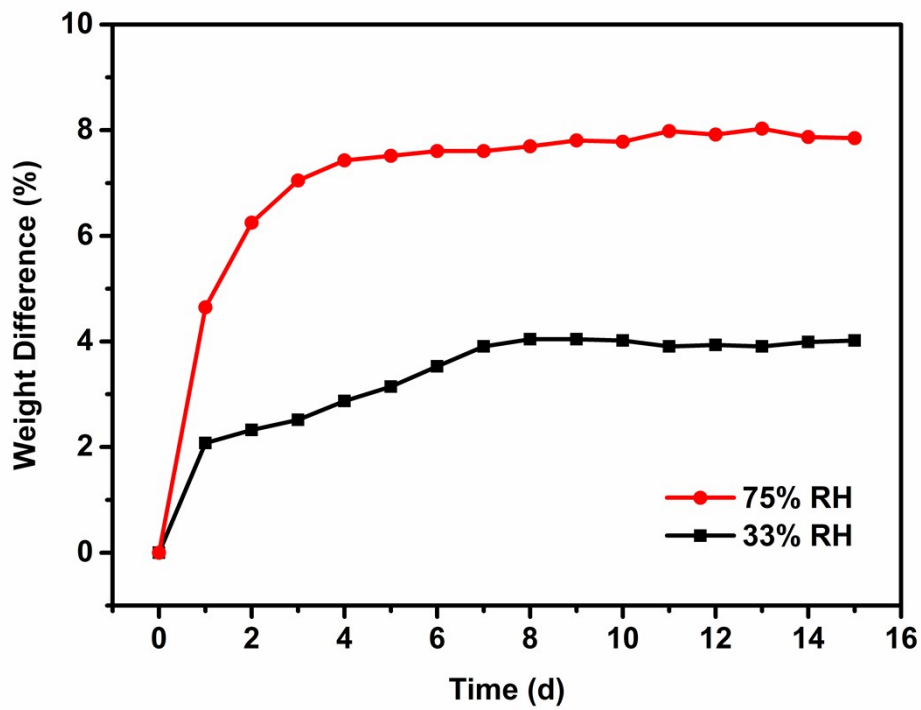

S9: Humidity absorption tests of HPA-120

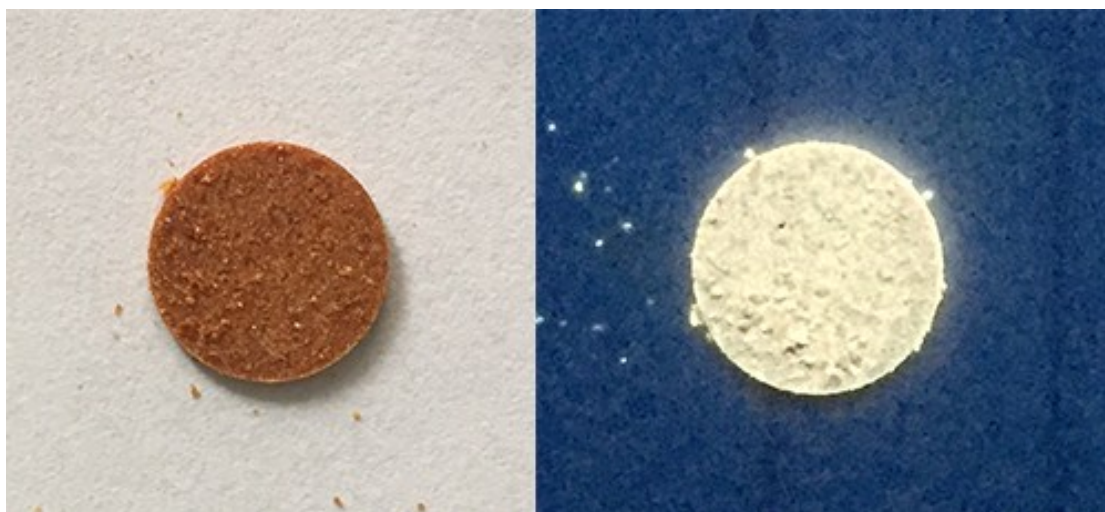

S10: The pressed film of HPA-140 were excited with sunlight (left) and 365nm UV light (right)

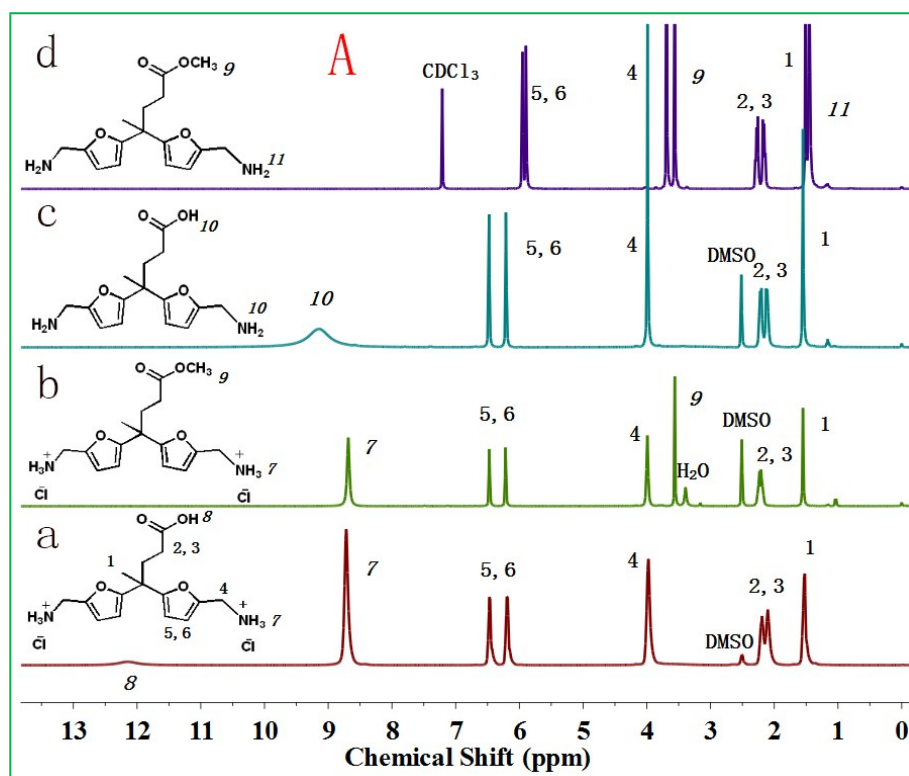

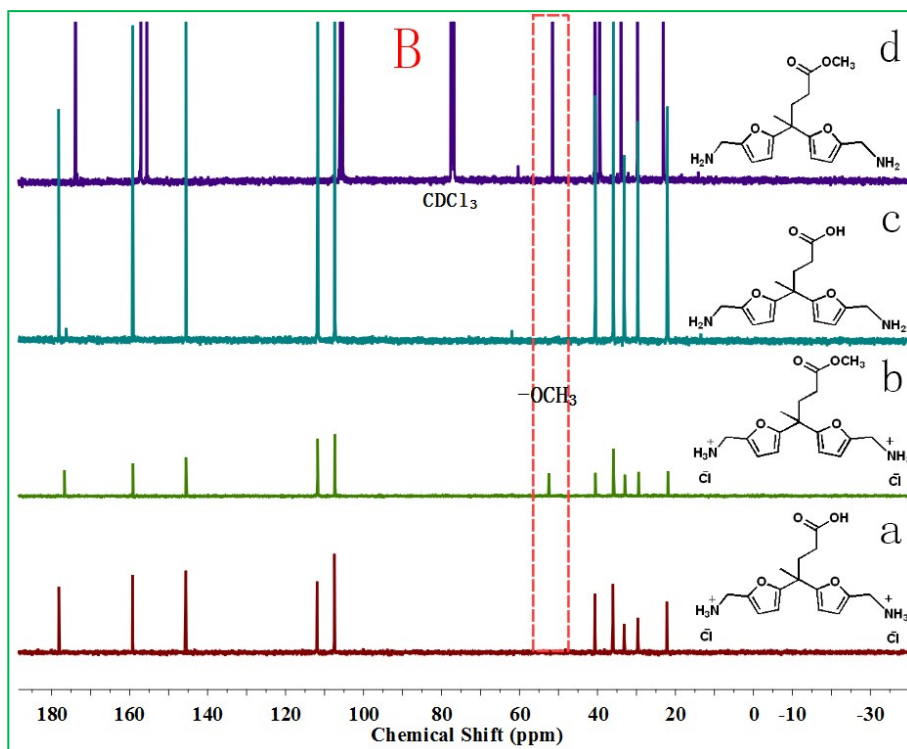

S11: NMR spectra of (a) FDAH-A, (b) FDAH-E, (c) FDA-A, and (d) FDA-E (A:  $^1\text{H}$  NMR; B:  $^{13}\text{C}$  NMR)

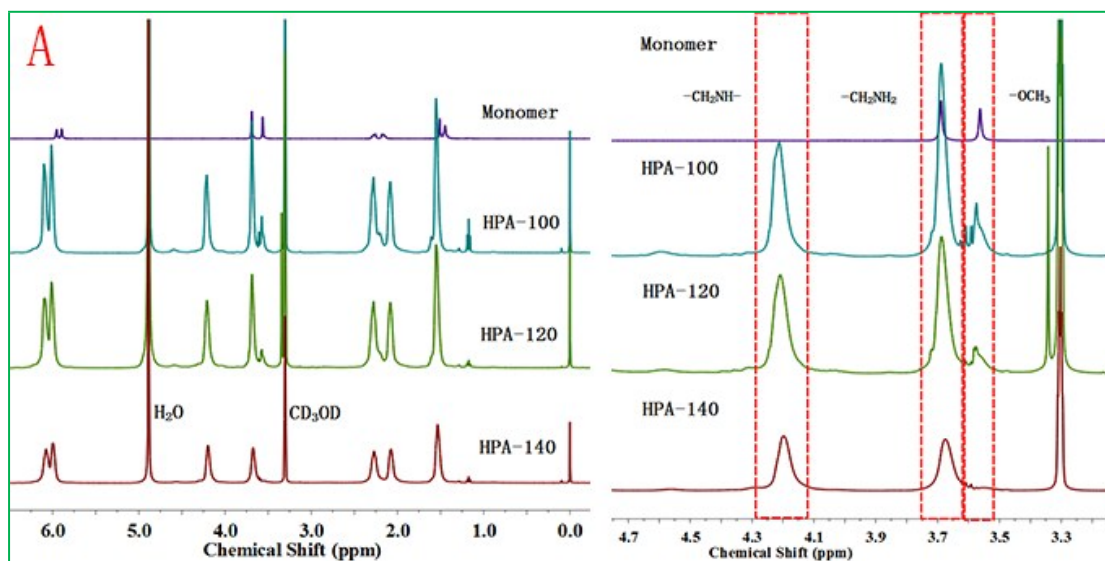

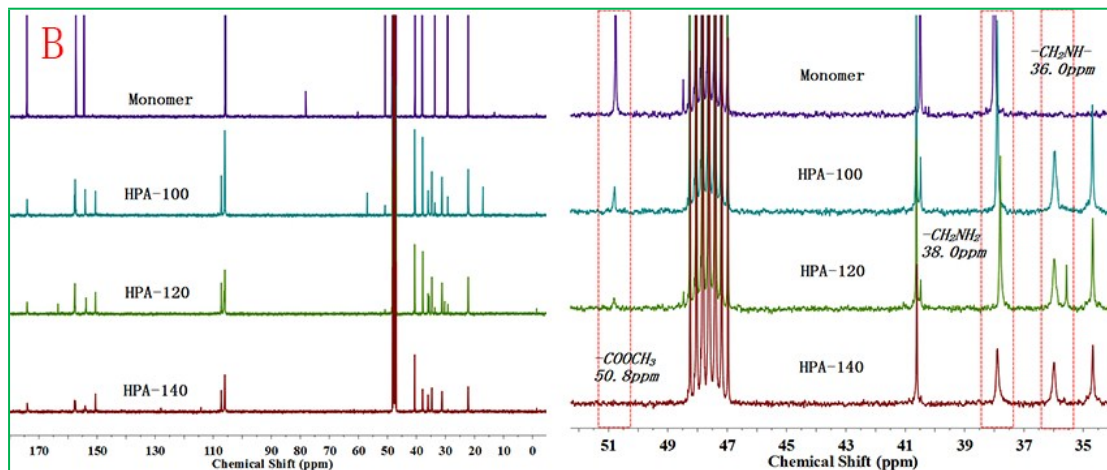

S12: NMR spectra of HPA-100, HPA-120, HPA-140, and FDA-E. (A:  $^1\text{H}$  NMR; B:  $^{13}\text{C}$  NMR)

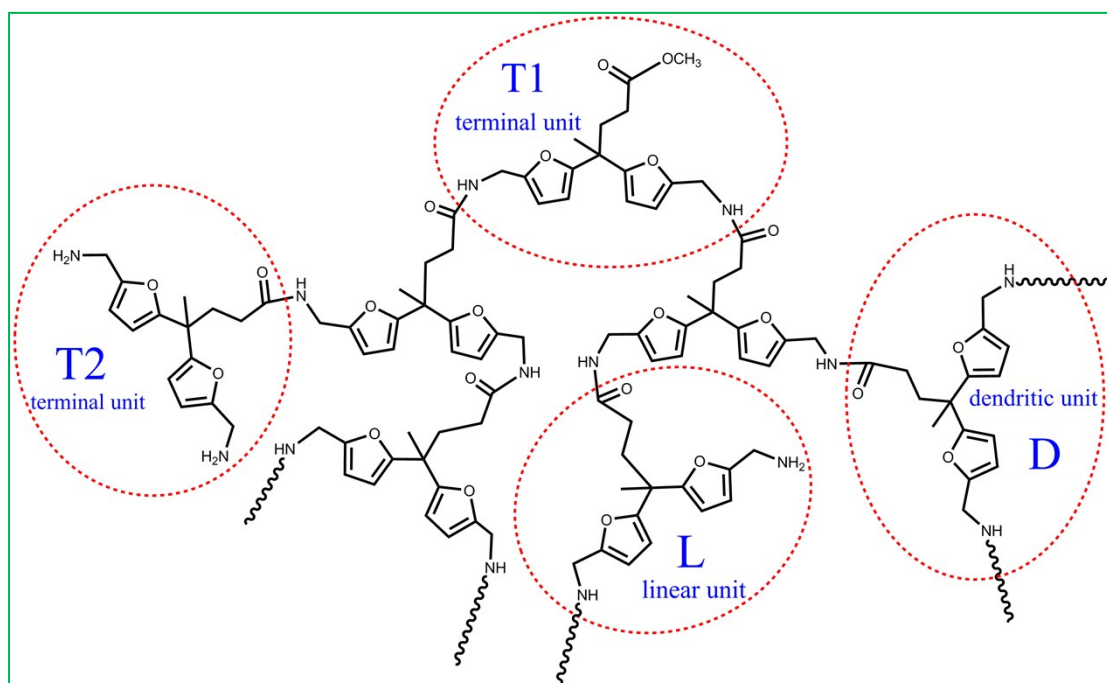

S13: Identification of dendritic (D), linear (L), and terminal (T) structure in hyperbranched polyamides
